# Supplementary material for: Acinetobacter baumannii Virulence Is Mediated by the Concerted Action of Three Phospholipases D
Source: PubMed Central journal article supplement (PMC4574555; doi:10.1371/journal.pone.0138360), 2015-09-17

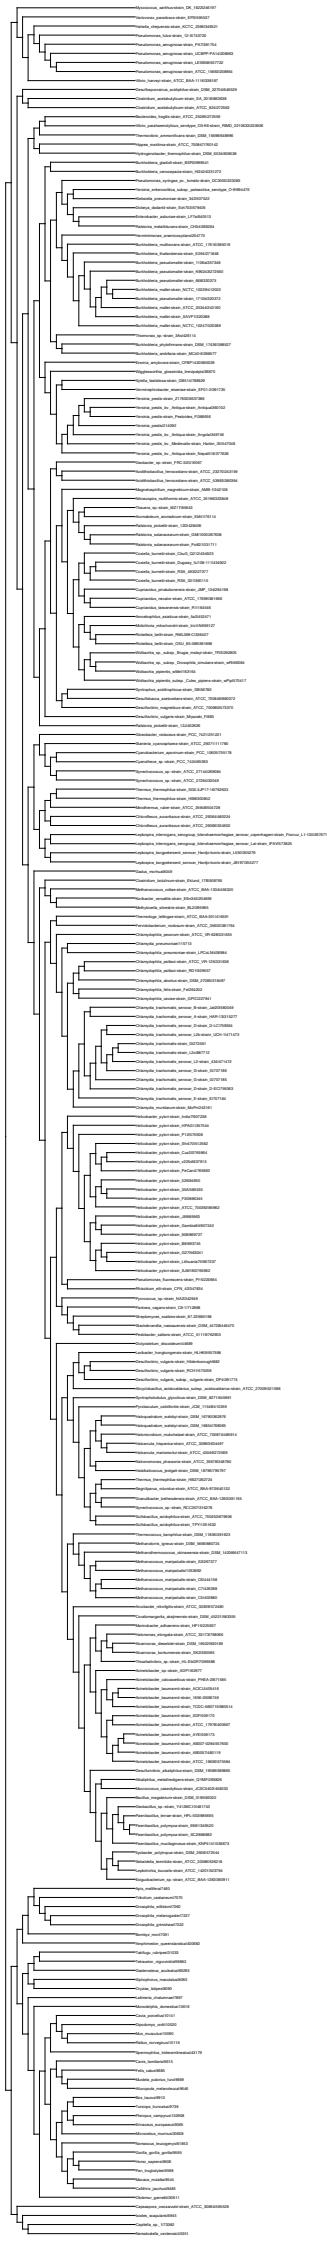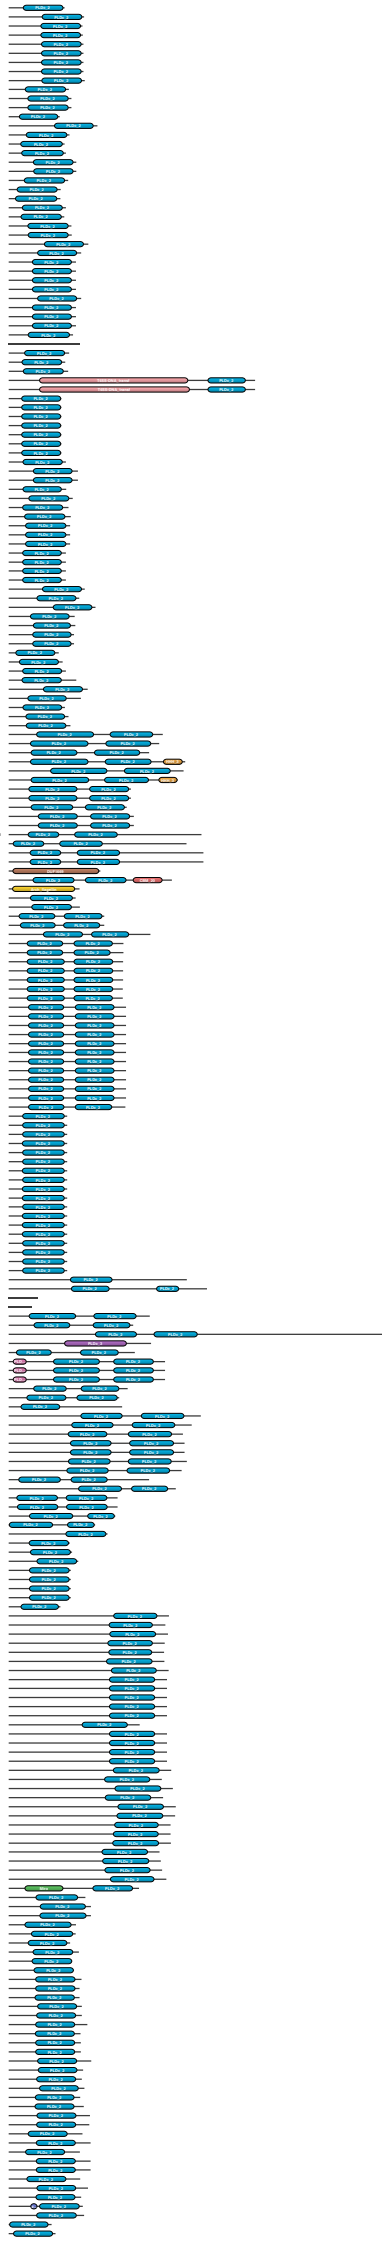

Supplement: pone.0138360.s001.pdf [file pone.0138360.s001.pdf]
